# Supplementary material for: Low humidity dependence of proton conductivity in modified zirconium( iv )-hydroxy ethylidene diphosphonates
Source: Royal Society of Chemistry journal article supplement (doi:10.1039/d2qm00428c), 2022-01-01
Supplement: d2qm00428c1.pdf [file d2qm00428c1.pdf]

## Supplementary Information

### Low humidity dependence of proton conductivity in modified zirconium (IV)-hydroxy ethylidene diphosphonates

Takaya Ogawa,<sup>1,†,\*</sup> Gopinathan M. Anilkumar,<sup>1,2</sup> Takanori Tamaki,<sup>1</sup> Hidenori Ohashi,<sup>1,‡</sup> Takeo Yamaguchi<sup>1,\*</sup>

<sup>1</sup>*Laboratory for Chemistry and Life Science, Institute of Innovative Research, Tokyo Institute of Technology, Nagatsuta 4259, Midori-ku, Yokohama 226-8503, Japan*

<sup>2</sup>*Research & Development Center, Noritake, Co., Ltd., 300 Higashiyama, Miyoshi cho, Miyoshi, Aichi 470-0293, Japan*

<sup>†</sup>*present address: Department of Socio-Environmental Energy Science, Graduate School of Energy Science,*

*Kyoto University, Yoshida-Honmachi, Sakyo-ku, Kyoto 606-8501, Japan.*

<sup>‡</sup>*present address: Department of Chemical Engineering, Tokyo University of Agriculture and Technology, 2-24-16 Naka-cho, Koganei, Tokyo 184-8588, Japan*

\*Author to whom correspondence to be addressed. Electronic mail: ogawa.takaya.8s@kyoto-u.ac.jp

(T. O.); yamag@res.titech.ac.jp (T. Y.)

## I. Several synthesis conditions and the ICP-AES results

Other synthesis conditions were tested to synthesize ZrHEDP with various P/Zr. The nitric acid concentration and the weight ratio of HEDP/Zr-precursor were changed, and the obtained ZrHEDP was characterized by ICP-AES measurement. Table S1 presents their conditions and P/Zr, where the same heating and washing processes in the main text were employed. A high concentration of nitric acid and a large weight ratio of HEDP/Zr-precursor lead to a high P/Zr. However, even if we use their high values, ZrHEDP with  $P/Zr > 3$  was not obtained. ZrHEDP with  $P/Zr > 3$  should have fewer “bridging HEDPs,” resulting in more open space for water adsorption and free  $-PO_3H_2S$ , and overly hydrophilic properties. It might be the reason that ZrHEDP with  $P/Zr > 3$  dissolved in water in washing processes, and then we could not obtain it.

Table S1 P/Zr values of ZrHEDP samples synthesized under several conditions

| HEDP/Zr-precursor<br>(Weight ratio) | P/Zr (ICP-AES results)  |                         |                         |
|-------------------------------------|-------------------------|-------------------------|-------------------------|
|                                     | 0.08 M HNO <sub>3</sub> | 1.00 M HNO <sub>3</sub> | 5.00 M HNO <sub>3</sub> |
| 2.00                                |                         |                         | 2.9                     |
| 1.70                                | 2.5                     | 3.0                     |                         |
| 1.50                                | 2.6                     | 2.9                     |                         |
| 1.30                                |                         | 3.0                     | 3.0                     |
| 1.10                                | 2.5                     | 2.8                     |                         |
| 0.90                                | 2.1                     | 2.5                     |                         |
| 0.65                                |                         | 1.8                     |                         |

## II. Experimental results

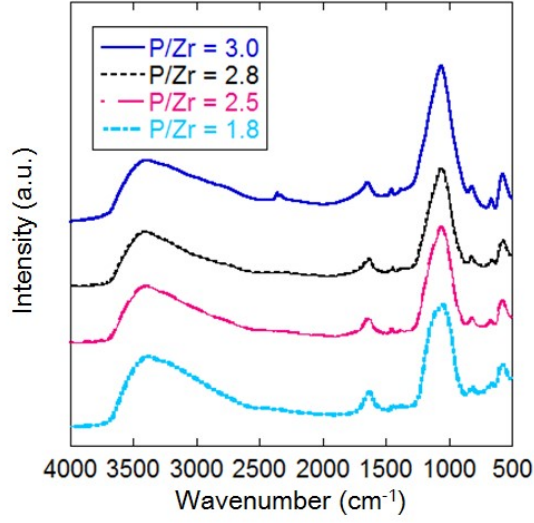

Figure S1 FTIR spectra of ZrHEDPs.

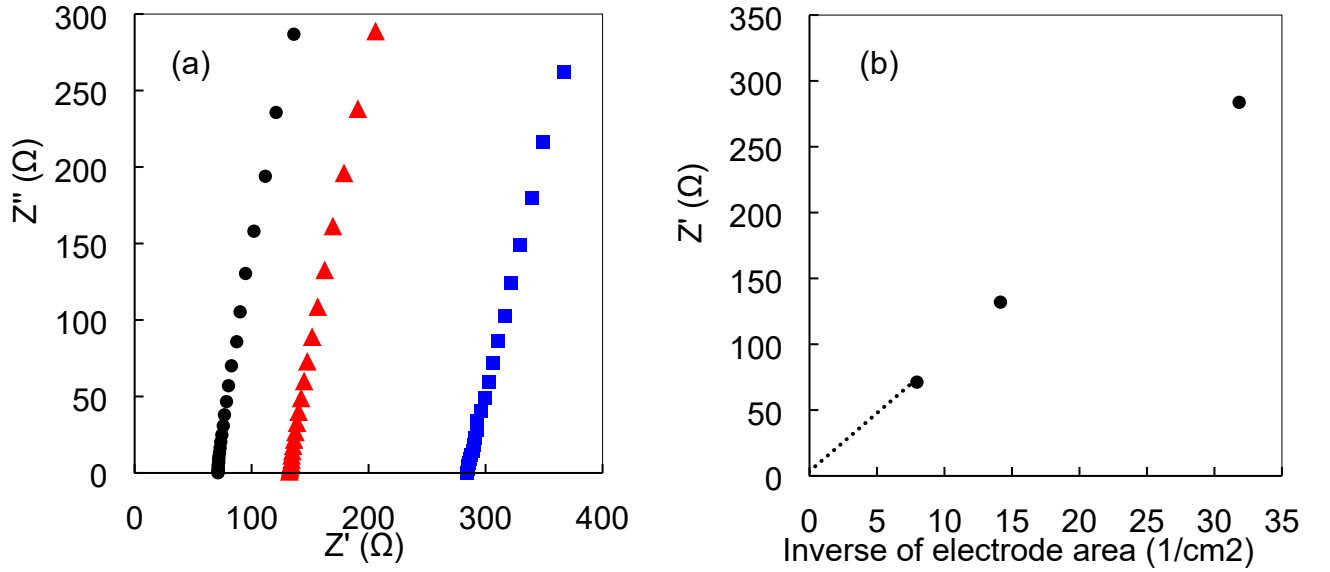

Figure S2 (a) Cole–Cole plots of the ZrHEDP with P/Zr = 2.8 at 95% RH and 90°C using different areas of electrodes. Black, red, and blue plots show the results employing the electrodes with the diameter values of 4 mm, 3 mm, and 2 mm, respectively. (b) The plots of resistivities against the inverse of the electrode areas. We observed the linear relation between them. According to Equation (S1), resistivity is linearly related to the inverse of an electrode area if the sample is in the same conditions and shows the same proton conductivity.

$$\sigma = \frac{d}{RA} \#(S1)$$

where  $\sigma$  is the proton conductivity,  $d$  is the distance between electrodes,  $A$  is the electrode area, and  $R$  is the resistivity. This means that these Cole–Cole plots are derived from the resistivities of the ZrHEDP sample.

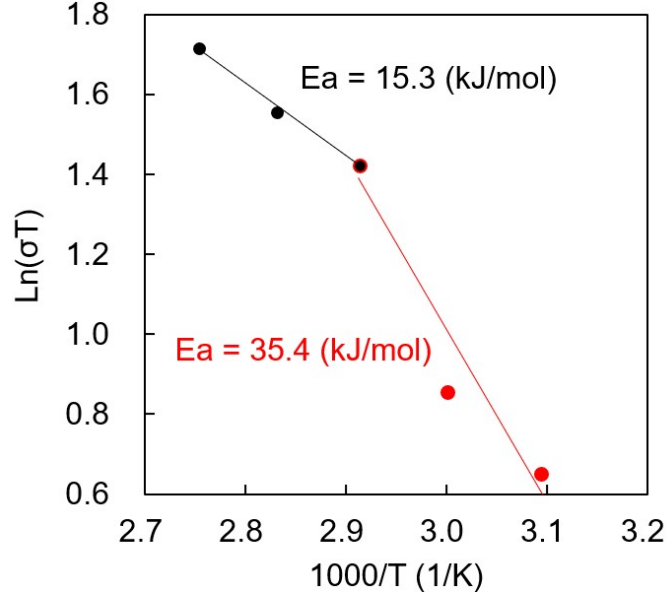

Figure S3. Arrhenius plots vs.  $T^{-1}$  from 50°C to 90°C at 95% RH. The slope seems to change at 70°C, which might be derived from the change in framework flexibility. The  $E_a$ s (kJ/mol) are shown for the two slopes, calculated through Equations (S2)–(S3). Both are below 0.4 eV, which is typically considered to be the  $E_a$  of the Grotthuss mechanism.<sup>S1</sup>

$$\sigma = \frac{D_T c e^2}{k_B T} = \frac{C}{T} \exp\left(-\frac{E_a}{k_B T}\right) \#(S2)$$

$$D_T = D_0 \exp\left(-\frac{E_a}{k_B T}\right) \#(S3)$$

where  $T$ ,  $c$ ,  $e$ ,  $k_B$ ,  $D_T$ ,  $D_0$ , and  $C$  are the absolute temperature, proton concentration, elementary charge, Boltzmann constant, temperature-dependent diffusivity coefficient, reference diffusivity coefficient, and pre-exponential factor, respectively.<sup>S2</sup>

### III. The estimation method of the average distance between $-\text{PO}_3\text{H}_2$ moieties in ZrHEDP samples

The average distance between  $-\text{PO}_3\text{H}_2$  moieties in ZrHEDP samples is estimated based on the phosphorous ( $-\text{PO}_3\text{H}_2$ ) concentrations per the volume of pellets for proton conductivity measurements, explained as follows. Table S2 presents all the data for the calculation.

The weight density per volume ( $\rho$ ) of the ZrHEDP pellets is simply calculated from the weight and volume of the pellets for proton conductivity measurements. ICP-AES results indicate the phosphorous molar concentration per weight of ZrHEDP samples ( $C_P$ ). We can then estimate a

phosphorous molar concentration per volume of the pellets ( $\rho C_P$ ).

Two phosphorous per zirconium, at least, have to be included in the ZrP frame [see Fig. 1(c)]. Therefore, the value of  $\{(P/Zr)-2\}/(P/Zr)$  represents the “minimum” ratio of  $-PO_3H_2$  per whole phosphorus in a ZrHEDP. The ratio is the “minimum” because there is a possibility that ZrHEDP samples have remained  $ZrO_2$ , which misleadingly decreases  $P/Zr$ , and then the samples actually include more dense  $-PO_3H_2$  in the structures of ZrHEDP with  $P/Zr = 4$ . In addition, the remaining HEDP in ZrHEDP samples is denied by NMR results.

Multiplying the phosphorous concentration per volume ( $\rho C_P$ ) by the values of  $\{(P/Zr)-2\}/(P/Zr)$ , we obtain  $-PO_3H_2$  molar concentration per volume of the pellets. Assuming a cubic around  $-PO_3H_2$  with  $r$  as one side,  $r$  is the average distance between  $-PO_3H_2$ s. One  $-PO_3H_2$  in the single cubic is equal to the number of  $-PO_3H_2$ s per volume,  $[\rho C_P N_A \times \{(P/Zr)-2\}/(P/Zr)]$ , described as follows:

$$\left(\frac{1}{r}\right)^3 = \left\{ \rho C_P N_A \times \left[ \frac{(P/Zr)-2}{(P/Zr)} \right] \right\} \# (S4)$$

where  $N_A$  is the Avogadro constant ( $\text{mol}^{-1}$ ). The average distances are then calculated through Eq. (S4) (7.4, 9.0, and 10.7 Å for  $P/Zr = 3.0, 2.8,$  and  $2.5,$  respectively). As for the ZrHEDP  $P/Zr = 1.8,$  the above method cannot be applied because  $\{(P/Zr)-2\}/(P/Zr)$  is a negative value.

The phosphorous density per volume of ZrHEDP pellets (distance between phosphorous) can be obtained objectively at least using the ICP-AES results and the volume and weight of pellets. As presented in Table S2, the distance between phosphorus is around 5 Å, approximately the same as the P-P distance in the ZrP framework (see Fig. 1). It verifies that the above method is sufficient to estimate the distance roughly.

The average distance of ZrHEDP with  $P/Zr = 3.0$  was 7.4 Å, which is shorter than the expected average distance [9–11 Å, Fig. 1 (d)] along with the zirconium phosphonate plane. It should be because the pellets were formed by pressing and the acid distance between the 2D planes of the ZrHEDPs became close. In addition, as the value of  $P/Zr$  increases among  $P/Zr = 2.5, 2.8,$  and  $3.0,$  the distance between phosphorus seems short. This might be because less “bridging HEDPs” make the 2D planes close.

Table S2 Data for the average distance between -PO<sub>3</sub>H<sub>2</sub> moieties in ZrHEDP samples

| P/Zr                                                                                                        | 3.0     | 2.8     | 2.5     | 1.8     |
|-------------------------------------------------------------------------------------------------------------|---------|---------|---------|---------|
| Area of pellet (cm <sup>2</sup> )                                                                           | 1.327   | 1.327   | 1.327   | 1.327   |
| Thickness of pellet (cm)                                                                                    | 0.085   | 0.075   | 0.039   | 0.078   |
| Weight of pellet (g)                                                                                        | 0.210   | 0.201   | 0.100   | 0.204   |
| Weight density of pellet ( $\rho$ , g cm <sup>-3</sup> )                                                    | 1.855   | 2.008   | 1.950   | 1.974   |
| Phosphorous amount per weight by ICP-AES results, ( $C_p$ , mol g <sup>-1</sup> )                           | 0.00668 | 0.00573 | 0.00547 | 0.00554 |
| Density of phosphorus ( $\rho C_p N_A$ , nm <sup>-3</sup> )                                                 | 7.46    | 6.94    | 6.43    | 6.59    |
| $\{(P/Zr)-2/(P/Zr)\}$                                                                                       | 0.325   | 0.195   | 0.126   | -0.055  |
| Density of -PO <sub>3</sub> H <sub>2</sub> ( $\rho C_p N_A \times \{(P/Zr)-2/(P/Zr)\}$ , nm <sup>-3</sup> ) | 2.425   | 1.354   | 0.810   | N/A     |
| Distance between phosphorus (Å)                                                                             | 5.1     | 5.2     | 5.4     | 5.3     |
| Distance between -PO <sub>3</sub> H <sub>2</sub> (Å)                                                        | 7.4     | 9.0     | 10.7    | N/A     |

## References

1. S.-S. Bao, G. K. H. Shimizu and L.-M. Zheng, Proton conductive metal phosphonate frameworks, *Coord. Chem. Rev.*, 2019, **378**, 577-594.
2. P. W. Atkins, J. De Paula and J. Keeler, *Atkins' Physical Chemistry*, Oxford University Press, 2018.
